# Supplementary material for: Effects of reduced carbonic anhydrase activity on CO2 assimilation rates in Setaria viridis: a transgenic analysis
Source: PubMed Central journal article supplement (PMC5853810; doi:10.1093/jxb/erw357), 2016-10-04
Supplement: erw357_suppl_supplementary_table_s1_figures_s1_s5.pdf [file erw357_suppl_supplementary_table_s1_figures_s1_s5.pdf]

Supplementary Table 1: Primers used in this study.

| Gene          | Description                   | Sequence 5' - 3'                                                                                        | Amplicon Size (bp) | Use                     |
|---------------|-------------------------------|---------------------------------------------------------------------------------------------------------|--------------------|-------------------------|
| Si016746m     | Ubiquitin                     | F: GATCTCCGCCCCAGCAAGAT<br>R: ATGCCCTCCTTGTCTGGAT                                                       | 124                | RT-qPCR<br>housekeeping |
| Si022040m     | Elongation factor 1a          | F: GCTGCAACAAGATGGATGCC<br>R: CCAGAGATTGGGACGAAGGC                                                      | 132                | RT-qPCR<br>housekeeping |
| Si035709m     | Beta tubulin                  | F: CTAAAGCTCGCCACCCCTAC<br>R: GTCGGAGTTGAGCTGACCAG                                                      | 104                | RT-qPCR<br>housekeeping |
| Si030616m     | $\beta$ CA                    | F: AGATGATTCAACCTCTGGAAGCT<br>R: TTGCACTGCATTTCAAACCTCA                                                 | 110                | RT-qPCR                 |
| Si002140m     | $\beta$ CA                    | F: AGGCCGACAAGTTCCACTTC<br>R: CATTGGTCCTCGAAAGCAGC                                                      | 102                | RT-qPCR                 |
| Si002669m     | $\beta$ CA                    | F: GGCTGGGTTTCAGGACGTTTA<br>R: AGAGTCAGAGCACGCAAACA                                                     | 112                | RT-qPCR                 |
| Si003882m     | $\beta$ CA                    | F: CATAAATTCCTCCGCCTCGT<br>R: CTCTCAAGCGCTCGACGG                                                        | 101                | RT-qPCR                 |
| Si003882m     | $\beta$ CA                    | F: GAGGGCCAGGCACCCAGGTA<br>R: GACGGCGTACTCGATGGCGG                                                      | 177                | pSG/CAa insert          |
|               | Hygromycin phosphotransferase | F: TGGCGTGATTTTCATATGCGC<br>R: CGTCAACCAAGCTCTGATAG                                                     | 420                | Genotyping              |
| GRMZM2G348512 | ZmCA2                         | F:<br>CACCATGGACGACCCCGTCGAGCGCTTGAAGGAC<br>R:<br>TCAAGACCAGCCGCTCGCATCTTTCCAAGACGATG<br>GCTGCTTATTGTCC | 625                | pSC110/ZmCA2<br>insert  |

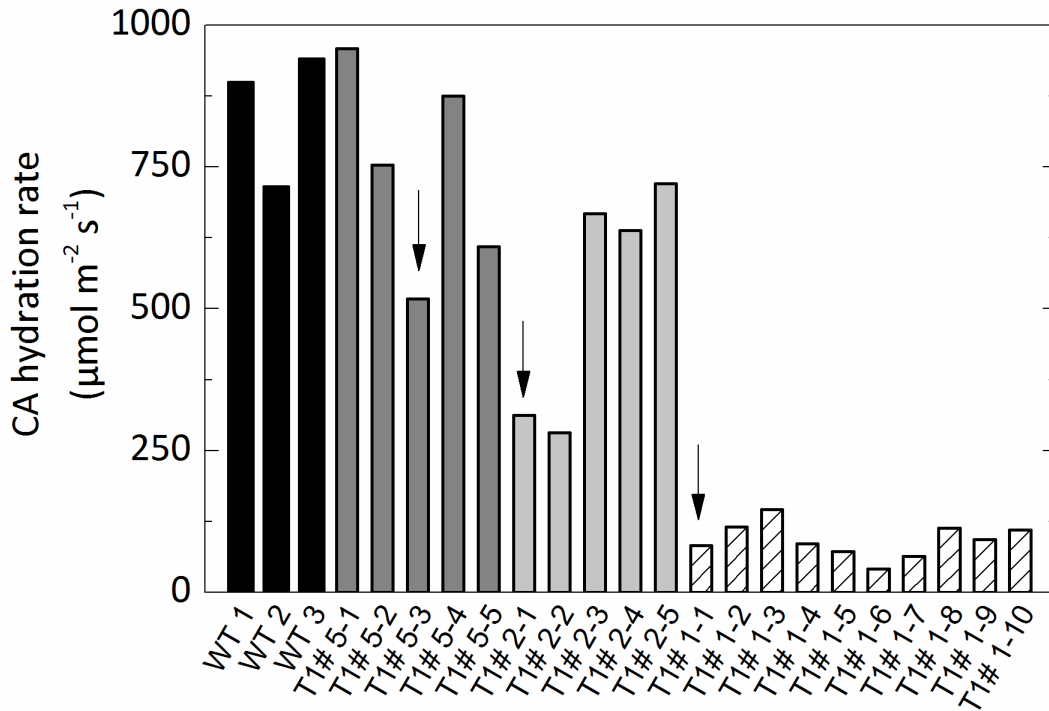

Supplementary Figure 1: CA hydration rates at mesophyll  $p\text{CO}_2$  in the  $T_1$  plants from three transformation events.  $T_0$  lines #5 and #2 were generated using the RNAi vector pSG/CAa.  $T_0$  line #1 was generated by gene suppression with pSC110/*ZmCA2*. Arrows indicate the  $T_1$  plants with low CA hydration rates whose progeny were then used for future studies and are labelled T1#5-3, T1#2-1 and T1#1-1.

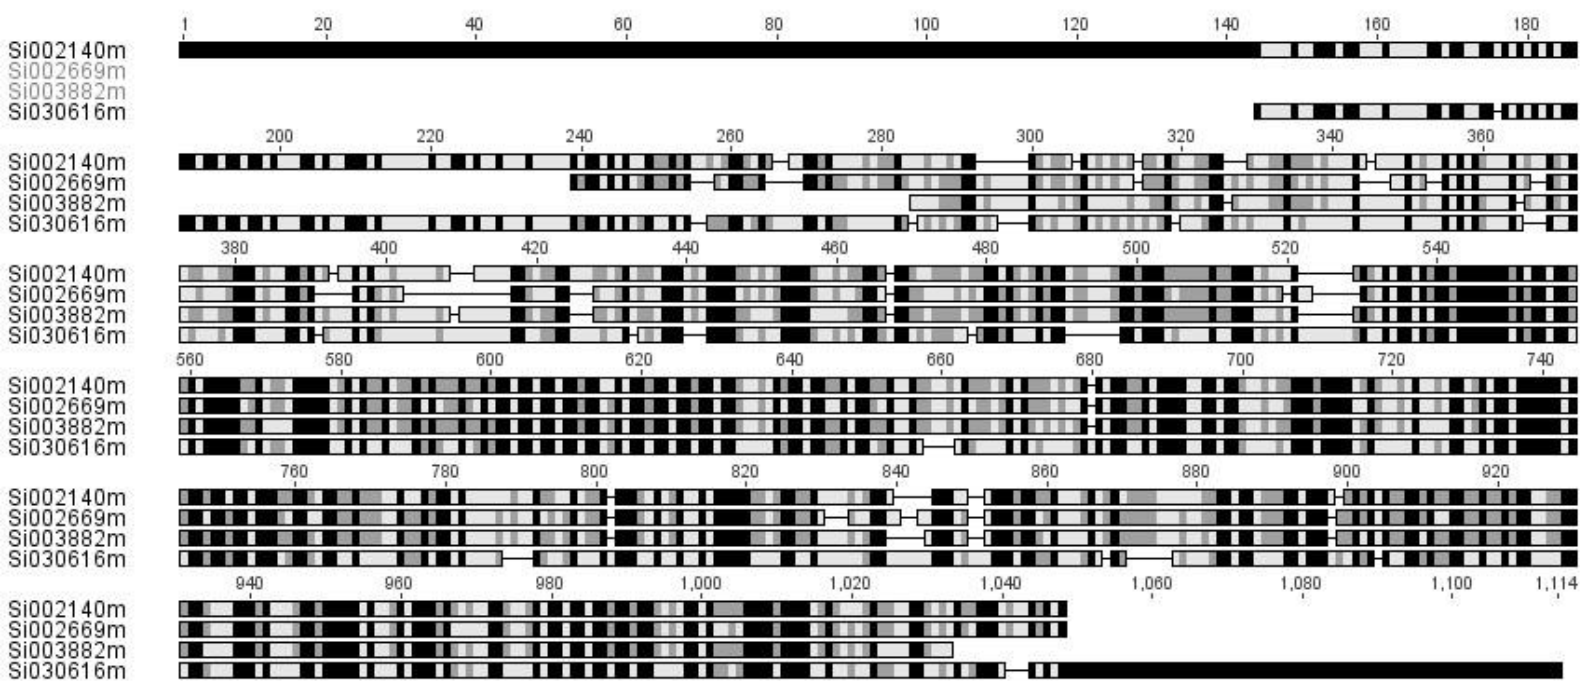

Supplementary Figure 2: Very low DNA sequence identity (~37%) between the four main *Setaria*  $\beta$ -CAs using Clustal-W alignment.

pSC110/ZmCA2  
 Si003882m  
 ATGAGCGGGTGCCTTTGCCCTCCC TAAAAAGAAGGAGGGGGTCTCCGCAGCGAAGCAGTCCA TAAAT TCC

pSC110/ZmCA2  
 Si003882m  
 CCCGCCTCGTCACTCCTCCAGAACCAGAAGCCACCCAACCTCCACCTCCTCCT TCCAAGAAGGGC **ATG**

pSC110/ZmCA2  
 Si003882m  
**GACGACC** **CCGTCGAGCGCTTGAAG** GA **GGGTTTC** **ACAAGTTCAAGACCGA** G **GTCTATGACAAGAAGCCG**  
**GACC** --- **CCGTCGAGCGCTTGAAG** AG **GGGTTT** G **ACAAGTTCAAGACCGA** T **GTCTATGACAAGAAGCCG**

pSC110/ZmCA2  
 Si003882m  
**GAGCTGTTCCGAGCC** **CTCAAGC** C **EGCCAGGC** **CCCA** A **GTAC** G **TGGTGT** T **CCCTGCTCCGACTCCCG** C  
**GAGCTGTTCCGAGCC** **CTCAAGC** A G **EGCCAGGC** **CCCA** S **GTAC** A **TGGTGT** T **CCCTGCTCCGACTCCCG** T

pSC110/ZmCA2  
 Si003882m  
 GTG **TGCCCCGTCCGTTGACCC** **TGGGCCTGCAGCCCGGGGAGGCCTTCACCGTCCCGCAACATCCGCCGCCATG**  
 TGC **TGCCCCGTCCGTTGACCC** **TGGGCCTGCAGCCCGGGGAGGCCTTCACCGTCCCGCAACATCCGCCGCCATG**

pSC110/ZmCA2  
 Si003882m  
**GTCCCA** G S **TACGACAAGACCAAGTACACCGGCAT** **GGTCCGCCATCCGAGTACGCCGT** T **TGCCG** S **CTC**  
**GTCCCA** C S **TACGACAAGACCAAGTACACCGGCAT** **GGTCCGCCATCCGAGTACGCCGT** C **TGCCG** S **CTC**

pSC110/ZmCA2  
 Si003882m  
**AAGGTGGAGGTCCTC** G TG **GTCA** T **EGCCACAGC** T **CTGCGCGTGGCATCA** G **EGCGTCCCTCTCC** C **TCCAG**  
**AAGGTGGAGGTCCTC** ACC **GTCA** T **EGCCACAGC** C **CTGCGCGTGGCATCA** A **EGCGTCCCTCTCC** A **TGAAG**

pSC110/ZmCA2  
 Si003882m  
**CACGGCCACCTGACAAC** **TCCACTTCGT** T **GAGAAC** **TGGCTTAA** **CA** **TCCGCTTCC** C T **CCCAAGA** T **TAA**  
**CACGGCCACCTGACAAC** **TCCACTTCGT** S **GAGAAC** **TGGCTTAA** **CA** **TCCGCTTCC** T C **CCCAAGA** A **GAA**

pSC110/ZmCA2  
 Si003882m  
**GTG** AA **GA** **AAG** **ACCA** **CC** A **TGGGT** G **CCGTTCCGATGACCAGTCC** T **TA** **TTC** **TAGAGA** **AGGAGGCCGT** **TAA**  
**GTG** C T **CA** **CA** **ACCA** **CC** C **TGGGT** T **CCGTTCCGATGACCAGTCC** A **CC** T C T **TAGAGA** **AGGAGGCCGT** **TAA**

pSC110/ZmCA2  
 Si003882m  
 C **TGTC** **CCCT** **GA** S **AACCTC** AA **CACCTACCCCT** T C **GT** **AAGGA** **AGG** S C **TGGCCA** **ACGGGAC** G **GTCA** **AGCTG**  
 G **TGTC** **CCCT** C T A **AACCTC** C T **CACCTACCCCT** G G **GT** **AAGGA** **AGG** T G **TGGCCA** **ACGGGAC** A **GTCA** **AGCTG**

pSC110/ZmCA2  
 Si003882m  
**GTGGCGGGCCACTAC** **AAC** **TTCGT** **GTCA** **GGG** **A** **TTTC** **CT** **ACATGGGACA** **ATAAGCAGCCATCGT**  
**GTGGCGGGCCACTAC** **GAC** **TTCGT** **CAAC** **GGG** **T** **TTTC** **TC**

Supplementary Figure 3: High sequence identity (87%) of Si003882 to the *ZmCA2* (GRMZM2G348512) used for transformation in overexpression construct pSC110/ZmCA2 using Clustal-W alignment.

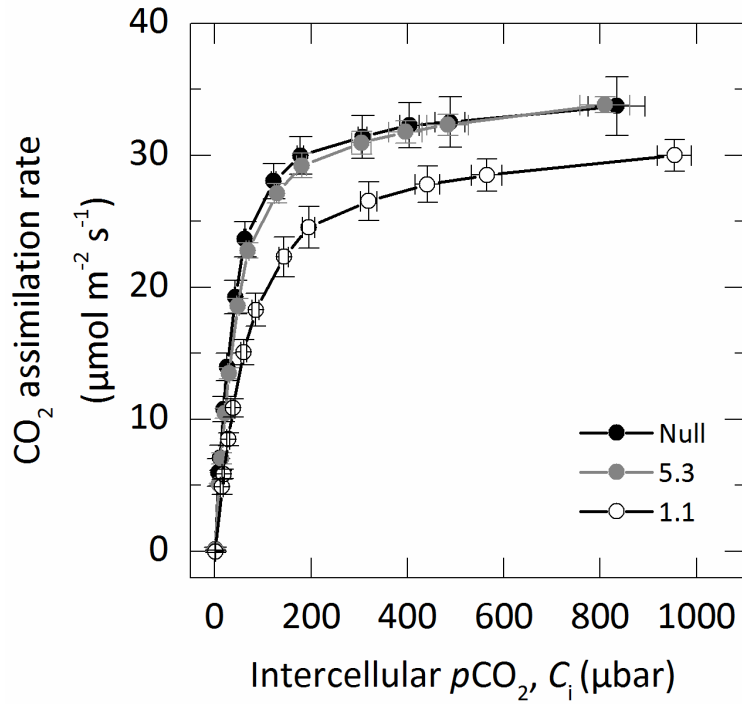

Supplementary Figure 4:  $\text{CO}_2$  assimilation rate of transformed lines over a range of intercellular  $p\text{CO}_2$  ( $C_i$ ). Average of three  $T_2$  plants of lines 5.3 and 1.1 were grown for TDL measurements. Plants were grown at 2 %  $\text{CO}_2$  and the uppermost, fully expanded leaf of 5 week old plants were measured using a Li6400 at 25 °C leaf temperature at an irradiance of 1500  $\mu\text{mol photons m}^{-2} \text{s}^{-1}$ .

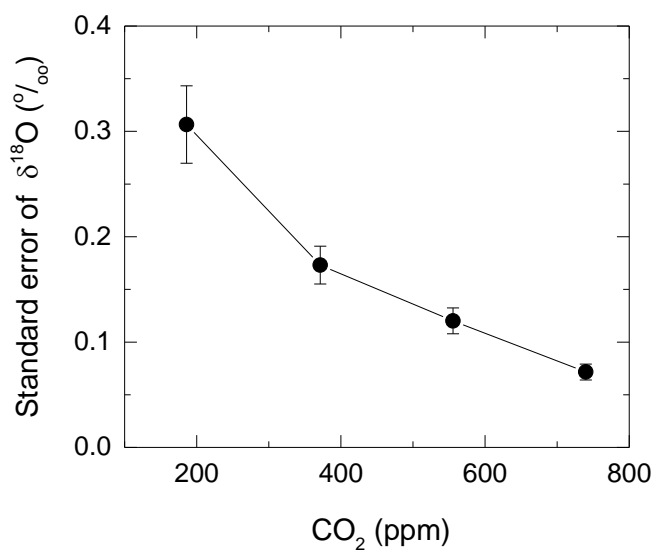

Supplementary Figure 5: Standard error of  $\delta^{18}\text{O}$  in the reference gas of repeated measurements on the TGA200A. Each point represents the average  $\pm$  s.e. of standard errors calculated from eight different experiments.
